# Supplementary material
Source: PubMed Central journal article supplement (PMC6250984)
Supplement: nqy171_supplemental_file.pdf [file nqy171_supplemental_file.pdf]

**Supplemental Figure 1.** Participant flow chart

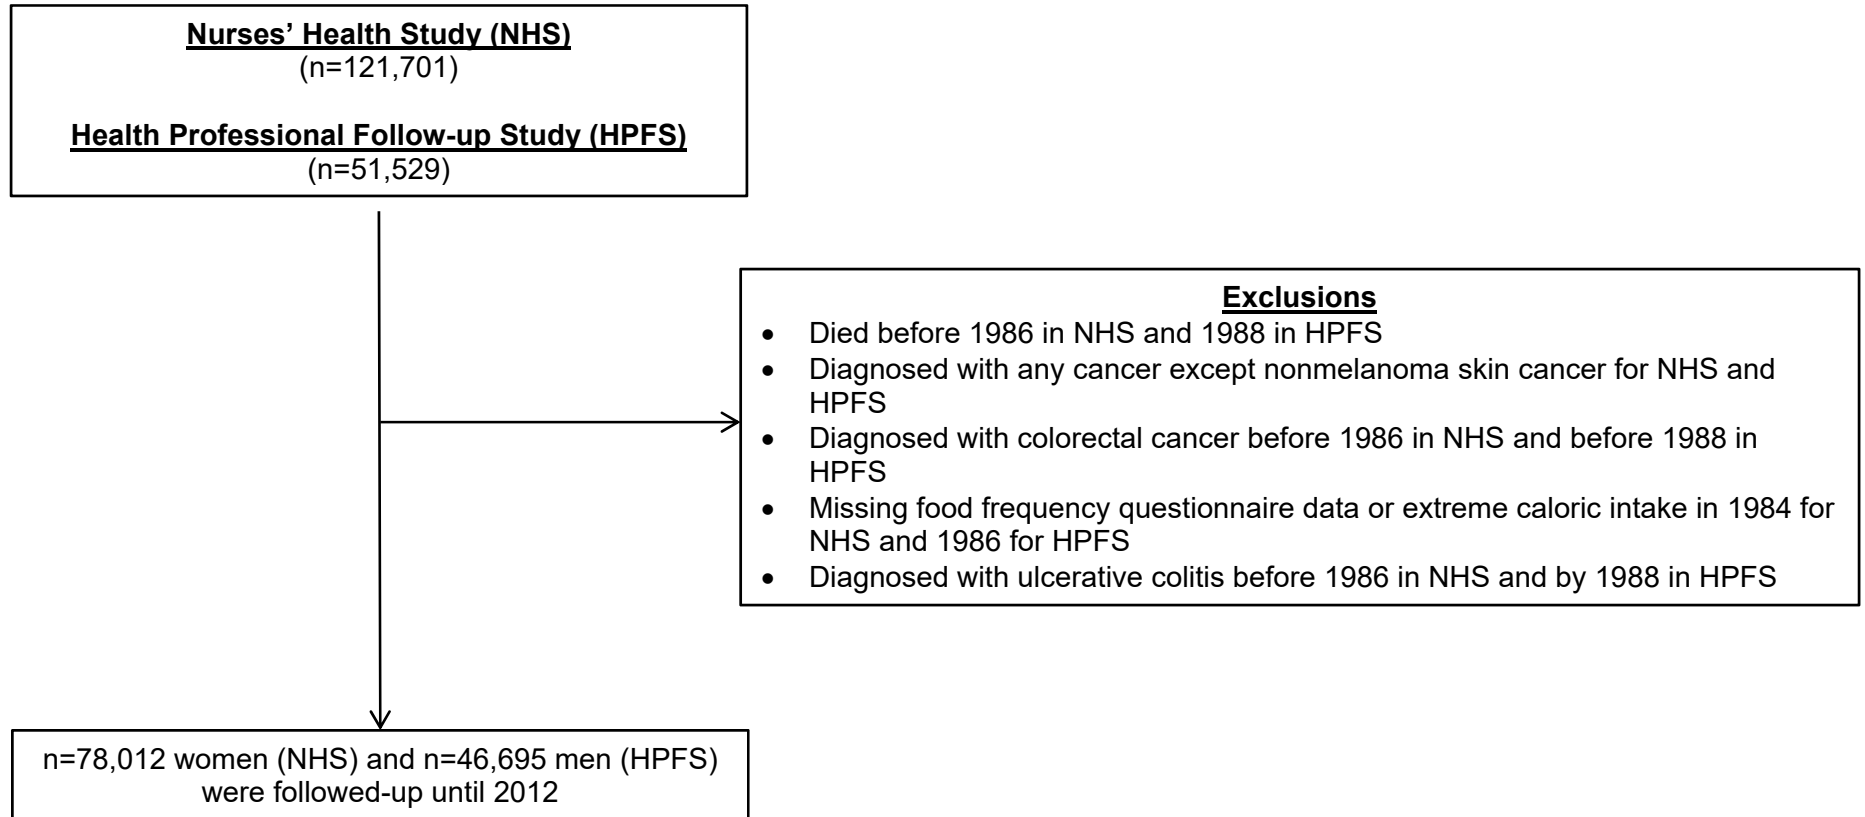

**Supplemental Table 1. Comparison of dietary components included in the Dietary Approaches to Stop Hypertension (DASH, Alternative Mediterranean Diet (AMED), and Alternative Healthy Eating Index-2010 (AHEI-2010) dietary indices and criteria for minimum and maximum points**

| Dietary Component                     | DASH <sup>1</sup>          | AMED <sup>2</sup>                                          | AHEI-2010 <sup>3</sup>                                                                                                                                      |
|---------------------------------------|----------------------------|------------------------------------------------------------|-------------------------------------------------------------------------------------------------------------------------------------------------------------|
| Fruits                                | Quintiles (1pt=Q1, 5pt=Q5) | High vs. low (0pt=below median, 1pt=above median)          | Absolute cutoffs (0pt=0 serv/day, 10pt= $\geq$ 4 serv/day)                                                                                                  |
| Vegetables                            | Quintiles (1pt=Q1, 5pt=Q5) | High vs. low (0pt=below median, 1pt=above median)          | Absolute cutoffs (0pt=0 serv/day, 10pt= $\geq$ 5 serv/day)                                                                                                  |
| Whole grains                          | Quintiles (1pt=Q1, 5pt=Q5) | High vs. low (0pt=below median, 1pt=above median)          | Absolute cutoffs (0pt=0 serv/day, 10pt= $\geq$ 75 g/day for women and $\geq$ 90 g/day for men)                                                              |
| Nuts <sup>4</sup>                     | Quintiles (1pt=Q1, 5pt=Q5) | High vs. low (0pt=below median, 1pt=above median)          | Absolute cutoffs (0pt=0 serv/day, 10pt= $\geq$ 1 serv/day)                                                                                                  |
| Legumes <sup>4</sup>                  | Quintiles (1pt=Q1, 5pt=Q5) | High vs. low (0pt=below median, 1pt=above median)          |                                                                                                                                                             |
| Low-fat dairy                         | Quintiles (1pt=Q1, 5pt=Q5) | --                                                         | --                                                                                                                                                          |
| Red/processed meat                    | Quintiles (1pt=Q5, 5pt=Q1) | High vs. low (0pt=below median, 1pt=above median)          | Absolute cutoffs (0pt= $\geq$ 1.5 serv/day, 10pt=0 serv/day)                                                                                                |
| Sugar-sweetened beverage <sup>5</sup> | Quintiles (1pt=Q5, 5pt=Q1) | --                                                         | Absolute cutoffs (0pt= $\geq$ 1 serv/day, 10pt=0 serv/day)                                                                                                  |
| Sodium intake                         | Quintiles (1pt=Q5, 5pt=Q1) | --                                                         | Absolute cutoffs (0pt=highest decile, 10pt=lowest decile)                                                                                                   |
| Alcohol                               | --                         | Moderate vs. not moderate (0pt=not moderate, 1pt=moderate) | Absolute cutoffs (0pt= $\geq$ 2.5 drinks/day for women and $\geq$ 3.5 drinks/day for men, 10pt=0.5-1.5 drinks/day for women and 0.5-2.0 drinks/day for men) |
| Fish                                  | --                         | High vs. low (0pt=below median, 1pt=above median)          | --                                                                                                                                                          |
| MUFA: SFA ratio                       | --                         | High vs. low (0pt=below median, 1pt=above median)          | --                                                                                                                                                          |
| Polyunsaturated fat                   | --                         | --                                                         | Absolute cutoffs (0pt= $\leq$ 2% energy, 10pt= $\geq$ 10% energy)                                                                                           |
| Omega-3 fatty acid                    | --                         | --                                                         | Absolute cutoffs (0pt=0mg/day, 10pt=250 mg/day)                                                                                                             |
| Trans fat                             | --                         | --                                                         | Absolute cutoffs (0pt= $\geq$ 4% energy, 10pt= $\leq$ 0.5% energy)                                                                                          |

DASH, Dietary Approaches to Stop Hypertension; AMED, Alternative Mediterranean Diet; AHEI-2010, Alternative Healthy Eating Index-2010; MUFA, monounsaturated fat; SFA, saturated fat

<sup>1</sup>For fruit, vegetable, whole grain, nut and legume, and low-fat dairy intake, the lowest quintile of intake received 1 point and each increasing quintile received an additional point. For red and processed meat, sugar-sweetened beverage, and sodium intake, the highest quintile of intake received 1 point and each decreasing quintile received an additional point.

<sup>2</sup>For all components except alcohol and red and processed meat intake, individuals with intake below the median received 0 points, and individuals with intake above the median received 1 point. For red and processed meat intake, individuals with intake above the median received 0 points, and individuals with intake below the median received 1 point. For alcohol intake, individuals with 5-15g/day of alcohol intake received 1 point and individuals with intake <5 or >15g/day of alcohol intake received 0 points.

<sup>3</sup>Intake between the minimum and maximum cutoffs was given a score between 0 and 10 proportional to intake (e.g. for fruit intake, 2 servings/day was given a score 0.5, and 3 servings/day was given a score of 0.75).

<sup>4</sup>Nut and legume intake were combined into one category in the DASH and AHEI-2010 diets, but were separate components in the AMED diet.

<sup>5</sup>Sugar-sweetened beverage intake included fruit juice in the AHEI-2010 diet but not in the DASH diet.

**Supplemental Table 2. Associations (multivariable hazard ratios, 95% confidence intervals) between quintiles of AMED and AHEI-2010 scores without alcohol and risk of colorectal cancer outcomes in the Nurses' Health Study and Health Professionals Follow-up Study**

|                                | Q1         | Q2                | Q3                | Q4                | Q5                | P for trend <sup>1</sup> |
|--------------------------------|------------|-------------------|-------------------|-------------------|-------------------|--------------------------|
| <b>Total colorectal cancer</b> |            |                   |                   |                   |                   |                          |
| Men <sup>2</sup>               |            |                   |                   |                   |                   |                          |
| No. cases (AMED/AHEI-2010)     | (236/218)  | (238/248)         | (241/240)         | (231/227)         | (216/229)         |                          |
| AMED                           | 1.00 (ref) | 0.96 (0.80, 1.15) | 0.89 (0.74, 1.08) | 0.97 (0.80, 1.17) | 0.80 (0.65, 0.98) | 0.03                     |
| AHEI-2010                      | 1.00 (ref) | 1.09 (0.90, 1.31) | 1.02 (0.84, 1.23) | 0.92 (0.76, 1.12) | 0.86 (0.71, 1.05) | 0.06                     |
| Women <sup>3</sup>             |            |                   |                   |                   |                   |                          |
| No. cases (AMED/AHEI-2010)     | (324/274)  | (275/296)         | (311/303)         | (300/335)         | (318/320)         |                          |
| AMED                           | 1.00 (ref) | 0.91 (0.77, 1.07) | 0.89 (0.75, 1.04) | 0.95 (0.80, 1.12) | 0.95 (0.79, 1.13) | 0.85                     |
| AHEI-2010                      | 1.00 (ref) | 1.02 (0.87, 1.19) | 1.02 (0.87, 1.19) | 1.08 (0.92, 1.27) | 1.00 (0.84, 1.20) | 0.76                     |
| <b>Total colon cancer</b>      |            |                   |                   |                   |                   |                          |
| Men <sup>2</sup>               |            |                   |                   |                   |                   |                          |
| No. cases (AMED/AHEI-2010)     | (180/174)  | (179/190)         | (195/190)         | (195/186)         | (172/181)         |                          |
| AMED                           | 1.00 (ref) | 0.93 (0.75, 1.15) | 0.94 (0.76, 1.17) | 1.08 (0.87, 1.33) | 0.83 (0.66, 1.04) | 0.27                     |
| AHEI-2010                      | 1.00 (ref) | 1.03 (0.84, 1.27) | 0.98 (0.80, 1.22) | 0.94 (0.76, 1.17) | 0.85 (0.68, 1.06) | 0.16                     |
| Women <sup>3</sup>             |            |                   |                   |                   |                   |                          |
| No. cases (AMED/AHEI-2010)     | (247/223)  | (215/235)         | (244/221)         | (241/269)         | (257/256)         |                          |
| AMED                           | 1.00 (ref) | 0.94 (0.78, 1.13) | 0.90 (0.75, 1.09) | 1.01 (0.83, 1.22) | 1.01 (0.82, 1.23) | 0.72                     |
| AHEI-2010                      | 1.00 (ref) | 0.98 (0.82, 1.16) | 0.97 (0.81, 1.16) | 1.06 (0.83, 1.27) | 1.01 (0.83, 1.23) | 0.61                     |
| <b>Proximal colon cancer</b>   |            |                   |                   |                   |                   |                          |
| Men <sup>2</sup>               |            |                   |                   |                   |                   |                          |
| No. cases (AMED/AHEI-2010)     | (70/71)    | (75/83)           | (82/66)           | (86/95)           | (83/81)           |                          |
| AMED                           | 1.00 (ref) | 0.95 (0.68, 1.33) | 0.95 (0.67, 1.32) | 1.13 (0.82, 1.57) | 0.92 (0.65, 1.31) | 0.79                     |
| AHEI-2010                      | 1.00 (ref) | 1.05 (0.76, 1.46) | 0.82 (0.58, 1.16) | 1.12 (0.81, 1.54) | 0.89 (0.64, 1.26) | 0.80                     |
| Women <sup>3</sup>             |            |                   |                   |                   |                   |                          |
| No. cases (AMED/AHEI-2010)     | (160/145)  | (144/143)         | (154/144)         | (140/155)         | (157/168)         |                          |
| AMED                           | 1.00 (ref) | 0.92 (0.73, 1.15) | 0.83 (0.66, 1.05) | 0.83 (0.65, 1.05) | 0.86 (0.67, 1.11) | 0.40                     |

|                            |            |                   |                   |                   |                   |       |
|----------------------------|------------|-------------------|-------------------|-------------------|-------------------|-------|
| AHEI-2010                  | 1.00 (ref) | 0.84 (0.67, 1.06) | 0.94 (0.75, 1.17) | 0.97 (0.77, 1.22) | 0.92 (0.72, 1.18) | 0.65  |
| <b>Distal colon cancer</b> |            |                   |                   |                   |                   |       |
| Men <sup>2</sup>           |            |                   |                   |                   |                   |       |
| No. cases (AMED/AHEI-2010) | (72/65)    | (66/70)           | (73/84)           | (69/51)           | (55/65)           |       |
| AMED                       | 1.00 (ref) | 0.90 (0.64, 1.27) | 0.95 (0.67, 1.34) | 0.99 (0.70, 1.39) | 0.70 (0.48, 1.02) | 0.17  |
| AHEI-2010                  | 1.00 (ref) | 1.03 (0.73, 1.45) | 1.19 (0.85, 1.67) | 0.76 (0.52, 1.10) | 0.83 (0.57, 1.21) | 0.26  |
| Women <sup>3</sup>         |            |                   |                   |                   |                   |       |
| No. cases (AMED/AHEI-2010) | (79/73)    | (65/89)           | (85/72)           | (97/102)          | (91/81)           |       |
| AMED                       | 1.00 (ref) | 0.96 (0.69, 1.34) | 1.07 (0.77, 1.48) | 1.47 (1.07, 2.03) | 1.28 (0.90, 1.82) | 0.13  |
| AHEI-2010                  | 1.00 (ref) | 1.25 (0.93, 1.67) | 1.01 (0.73, 1.38) | 1.16 (0.84, 1.59) | 1.12 (0.79, 1.57) | 0.37  |
| <b>Rectal cancer</b>       |            |                   |                   |                   |                   |       |
| Men <sup>2</sup>           |            |                   |                   |                   |                   |       |
| No. cases (AMED/AHEI-2010) | (56/44)    | (59/58)           | (46/50)           | (36/41)           | (44/48)           |       |
| AMED                       | 1.00 (ref) | 1.06 (0.73, 1.54) | 0.74 (0.49, 1.12) | 0.63 (0.41, 0.97) | 0.68 (0.44, 1.05) | 0.006 |
| AHEI-2010                  | 1.00 (ref) | 1.31 (0.87, 1.95) | 1.14 (0.75, 1.72) | 0.84 (0.54, 1.31) | 0.91 (0.58, 1.42) | 0.17  |
| Women <sup>3</sup>         |            |                   |                   |                   |                   |       |
| No. cases (AMED/AHEI-2010) | (77/51)    | (60/61)           | (67/82)           | (59/66)           | (61/64)           |       |
| AMED                       | 1.00 (ref) | 0.82 (0.58, 1.15) | 0.82 (0.59, 1.16) | 0.76 (0.53, 1.09) | 0.75 (0.50, 1.10) | 0.27  |
| AHEI-2010                  | 1.00 (ref) | 1.19 (0.85, 1.67) | 1.23 (0.87, 1.74) | 1.17 (0.81, 1.68) | 0.99 (0.66, 1.47) | 0.73  |

AMED, Alternative Mediterranean Diet; AHEI-2010, Alternative Healthy Eating Index-2010

<sup>1</sup>P-value for the continuous diet scores determined using the Wald test

<sup>2</sup>Adjusted for total energy intake (kcal/day, quintiles), alcohol intake (g/day, quintiles), physical activity (MET-hours/wk, quintiles), NSAID use ( $\geq 2$  NSAID/week vs.  $< 2$  NSAID/week [ref]), family history of CRC (yes vs. no [ref]), previous CRC screening via colonoscopy or sigmoidoscopy (yes vs. no [ref]), history of polyps (yes vs. no [ref]), smoking (never smoker [ref], 0- $<10$ , 10- $<20$ , 20- $<30$ , 30- $<40$ , 40- $<50$   $\geq 50$  packyears), multivitamin use (regular use vs. non-use [ref]), supplemental calcium intake (none [ref],  $>0-200$ ,  $>200-400$ ,  $>400-600$ ,  $>600$ mg/day), and young adult body mass index ( $<25$  [ref], 25- $<27.5$ , 27.5- $<30$ ,  $\geq 30$  kg/m<sup>2</sup>)

<sup>3</sup>Adjusted for same as multivariable models in men + menopausal status (postmenopausal vs. not [ref]), and postmenopausal hormone use (never use [ref], past use, current use)

**Supplemental Table 3. Associations (multivariable hazard ratios, 95% confidence intervals) between continuous DASH, AMED, and AHEI-2010 scores<sup>1</sup> and colorectal cancer risk stratified by dietary and lifestyle characteristics in the Nurses' Health Study and Health Professionals Follow-up Study**

|                                                 | DASH <sup>2</sup> |                    |                   |                    | AMED <sup>3</sup> |                    |                   |                    | AHEI-2010 <sup>3</sup> |                    |                   |                    |
|-------------------------------------------------|-------------------|--------------------|-------------------|--------------------|-------------------|--------------------|-------------------|--------------------|------------------------|--------------------|-------------------|--------------------|
|                                                 | HPFS              |                    | NHS               |                    | HPFS              |                    | NHS               |                    | HPFS                   |                    | NHS               |                    |
|                                                 | HR (95% CI)       | P-het <sup>4</sup> | HR (95% CI)       | P-het <sup>5</sup> | HR (95% CI)       | P-het <sup>4</sup> | HR (95% CI)       | P-het <sup>5</sup> | HR (95% CI)            | P-het <sup>4</sup> | HR (95% CI)       | P-het <sup>5</sup> |
| <b>Aspirin/NSAID</b>                            |                   |                    |                   |                    |                   |                    |                   |                    |                        |                    |                   |                    |
| High (n=546 HPFS cases; n=729 NHS cases)        | 0.86 (0.75, 0.98) | 0.34               | 1.04 (0.92, 1.17) | 0.30               | 0.86 (0.74, 1.00) | 0.42               | 1.01 (0.90, 1.14) | 0.68               | 0.87 (0.76, 0.99)      | 0.12               | 1.05 (0.93, 1.17) | 0.70               |
| Low (n=616 HPFS cases; n=799 NHS cases)         | 0.88 (0.78, 0.99) |                    | 0.93 (0.83, 1.03) |                    | 0.92 (0.81, 1.05) |                    | 1.00 (0.90, 1.11) |                    | 0.96 (0.86, 1.08)      |                    | 1.00 (0.91, 1.11) |                    |
| <b>Family History of CRC</b>                    |                   |                    |                   |                    |                   |                    |                   |                    |                        |                    |                   |                    |
| Yes (n=206 HPFS cases; n=295 NHS cases)         | 0.89 (0.71, 1.11) | 0.67               | 1.05 (0.87, 1.27) | 0.55               | 0.96 (0.74, 1.24) | 0.41               | 1.19 (0.99, 1.43) | 0.05               | 1.00 (0.81, 1.25)      | 0.73               | 1.09 (0.91, 1.31) | 0.69               |
| No (n=956 HPFS cases; n=1233 NHS cases)         | 0.87 (0.79, 0.95) |                    | 0.95 (0.87, 1.04) |                    | 0.87 (0.78, 0.97) |                    | 0.96 (0.88, 1.05) |                    | 0.89 (0.81, 0.98)      |                    | 1.01 (0.93, 1.10) |                    |
| <b>Obesity</b>                                  |                   |                    |                   |                    |                   |                    |                   |                    |                        |                    |                   |                    |
| Obese (n=159 HPFS cases; n=320 NHS cases)       | 0.70 (0.53, 0.92) | 0.06               | 0.93 (0.78, 1.12) | 0.70               | 0.82 (0.61, 1.11) | 0.40               | 0.90 (0.75, 1.08) | 0.33               | 0.95 (0.73, 1.24)      | 0.94               | 0.91 (0.76, 1.09) | 0.24               |
| Not obese (n=1003 HPFS cases; n=1208 NHS cases) | 0.91 (0.83, 1.00) |                    | 0.99 (0.90, 1.08) |                    | 0.91 (0.82, 1.01) |                    | 1.03 (0.94, 1.12) |                    | 0.92 (0.84, 1.01)      |                    | 1.05 (0.97, 1.15) |                    |
| <b>Smoking</b>                                  |                   |                    |                   |                    |                   |                    |                   |                    |                        |                    |                   |                    |
| Ever (n=682 HPFS cases; n=928 NHS cases)        | 0.89 (0.79, 1.00) | 0.90               | 0.99 (0.89, 1.10) | 0.45               | 0.89 (0.79, 1.01) | 0.78               | 0.99 (0.89, 1.10) | 0.99               | 0.93 (0.83, 1.04)      | 0.83               | 1.03 (0.93, 1.14) | 0.50               |
| Never (n=480 HPFS cases; n=600 NHS cases)       | 0.86 (0.75, 0.98) |                    | 0.93 (0.82, 1.06) |                    | 0.89 (0.76, 1.04) |                    | 1.01 (0.89, 1.15) |                    | 0.92 (0.80, 1.05)      |                    | 1.01 (0.89, 1.14) |                    |
| <b>Multivitamin Use</b>                         |                   |                    |                   |                    |                   |                    |                   |                    |                        |                    |                   |                    |
| Regular use (n=625 HPFS cases; n=524 NHS cases) | 0.98 (0.87, 1.10) | 0.06               | 0.91 (0.79, 1.05) | 0.32               | 0.97 (0.84, 1.11) | 0.24               | 0.94 (0.81, 1.08) | 0.20               | 0.96 (0.85, 1.08)      | 0.40               | 1.00 (0.87, 1.14) | 0.55               |



|                         |    |                   |      |    |    |                   |      |    |    |                   |      |
|-------------------------|----|-------------------|------|----|----|-------------------|------|----|----|-------------------|------|
| Ever (n=869 NHS cases)  | -- | 0.97 (0.87, 1.08) | 0.87 | -- | -- | 0.99 (0.89, 1.11) | 0.65 | -- | -- | 1.04 (0.94, 1.15) | 0.57 |
| Never (n=659 NHS cases) | -- | 0.96 (0.85, 1.08) |      | -- |    | 0.99 (0.88, 1.12) |      | -- |    | 0.98 (0.87, 1.10) |      |

<sup>1</sup>Per a one-unit increase in the interquartile range for each dietary score

<sup>2</sup>Adjusted for total energy intake (kcal/day, quintiles), alcohol intake (g/day, quintiles), physical activity (MET-hours/wk, quintiles), NSAID use (≥2 NSAIDs/week vs. <2 NSAIDs/week [ref]), family history of CRC (yes vs. no [ref]), previous CRC screening via colonoscopy or sigmoidoscopy (yes vs. no [ref]), history of polyps (yes vs. no [ref]), smoking (never smoker [ref], 0-<10, 10-<20, 20-<30, 30-<40, 40-<50 ≥50 packyears), multivitamin use (regular use vs. non-use [ref]), supplemental calcium intake (none [ref], >0-200, >200-400, >400-600, >600mg/day), and young adult body mass index (<25 [ref], 25-<27.5, 27.5-<30, ≥30 kg/m<sup>2</sup>); in women, additionally adjusted for menopausal status (postmenopausal vs. not [ref]), and postmenopausal hormone use (never use [ref], past use, current use)

<sup>3</sup>Adjusted for the same covariates as for the DASH diet but excluding alcohol intake

<sup>4</sup>P value for the interaction term between the potential effect modifier of interest and the continuous diet score in men determined using the Wald test

<sup>5</sup>P value for the interaction term between the potential effect modifier of interest and the continuous diet score in women determined using the Wald test
